# Supplementary material for: ALPPL2 Is a Potential Diagnostic Biomarker for Pancreatic Cancer-Derived Extracellular Vesicles
Source: PubMed Central journal article supplement — Mol Ther Methods Clin Dev. 2019 Sep 12;15:204–10. doi: 10.1016/j.omtm.2019.08.016 (PMC6819892; doi:10.1016/j.omtm.2019.08.016), 2019-09-12
Supplement: mmc1.pdf [file mmc1.pdf]

**OMTM, Volume 15**

**Supplemental Information**

**ALPPL2 Is a Potential Diagnostic Biomarker  
for Pancreatic Cancer-Derived Extracellular  
Vesicles**

**Hye-Su Shin, Sang Baek Jung, Sungho Park, Pooja Dua, and Dong ki Lee**

## Supplementary Figure 1

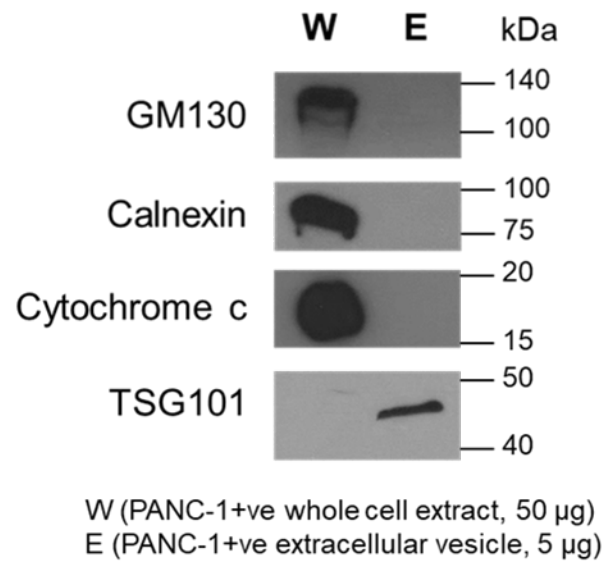

**Western Blot analysis to confirm the purity of the isolated EVs.** Panc-1+ve whole cell extract (50  $\mu$ g) and secreted EVs (5  $\mu$ g) were subjected to immunoblot analysis for markers of various cellular organelles: Calnexin (endoplasmic reticulum), GM130 (Golgi) and Cytochrome C (mitochondria). TSG101 was used as a marker of EVs. The exosome preparations were devoid of mitochondria, Golgi and ER protein contamination.

## Supplementary Figure 2

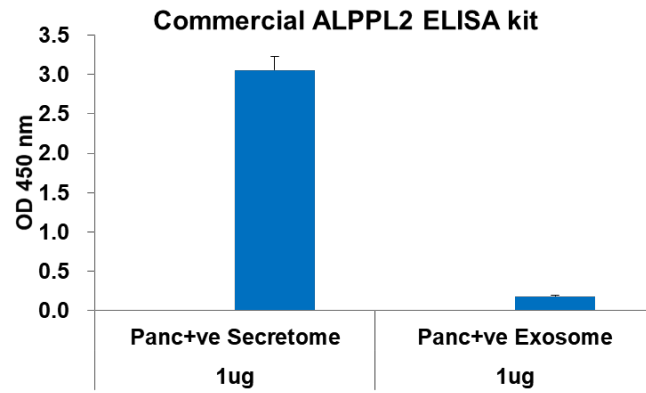

Quantification of ALPPL2 protein in commercial ALPPL2 sandwich ELISA kit (DL Develop, DL-ALPPL2-Hu). The commercial kit can detect ALPPL2 significantly in recombinant ALPPL2 proteins expressed in HEK293T cells and in PANC-1+ve secretomes. However, it did not show any reliable signals when PANC-1+ve EVs were added.
